# Supplementary material
Source: Springer Nature journal article supplement (https://www.springermedizin.de/resource/supplementary/12879_2012_2950_MOESM3_ESM.pdf/9445422)
Supplement: MOESM3 [file 9445422]

**A**

Frequency (%) of detected MSP1 block 2 alleles

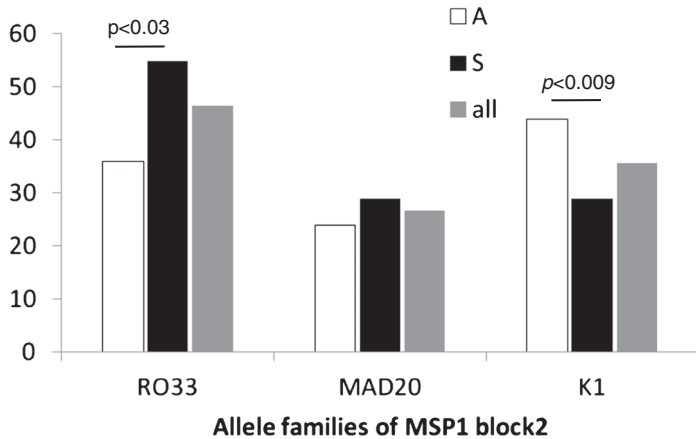**B**

Sequences (%) of distinct MSP1 block2

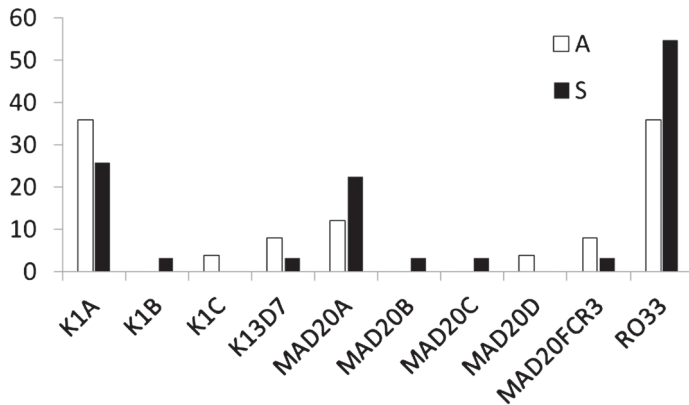

Sequence types of each allele family of MSP1 block 2
